# Supplementary material for: Efficacy and safety of an antithrombotic regimen for atrial fibrillation patients with acute coronary syndrome or those undergoing percutaneous coronary intervention: a meta-analysis
Source: publisher site journal article supplement (doi:10.18632/aging.103359), 2020-07-01
Supplement: Supplementary file [file aging-v12i13-103359-supplementary-material-SD1.pdf]

**SUPPLEMENTARY FIGURES**

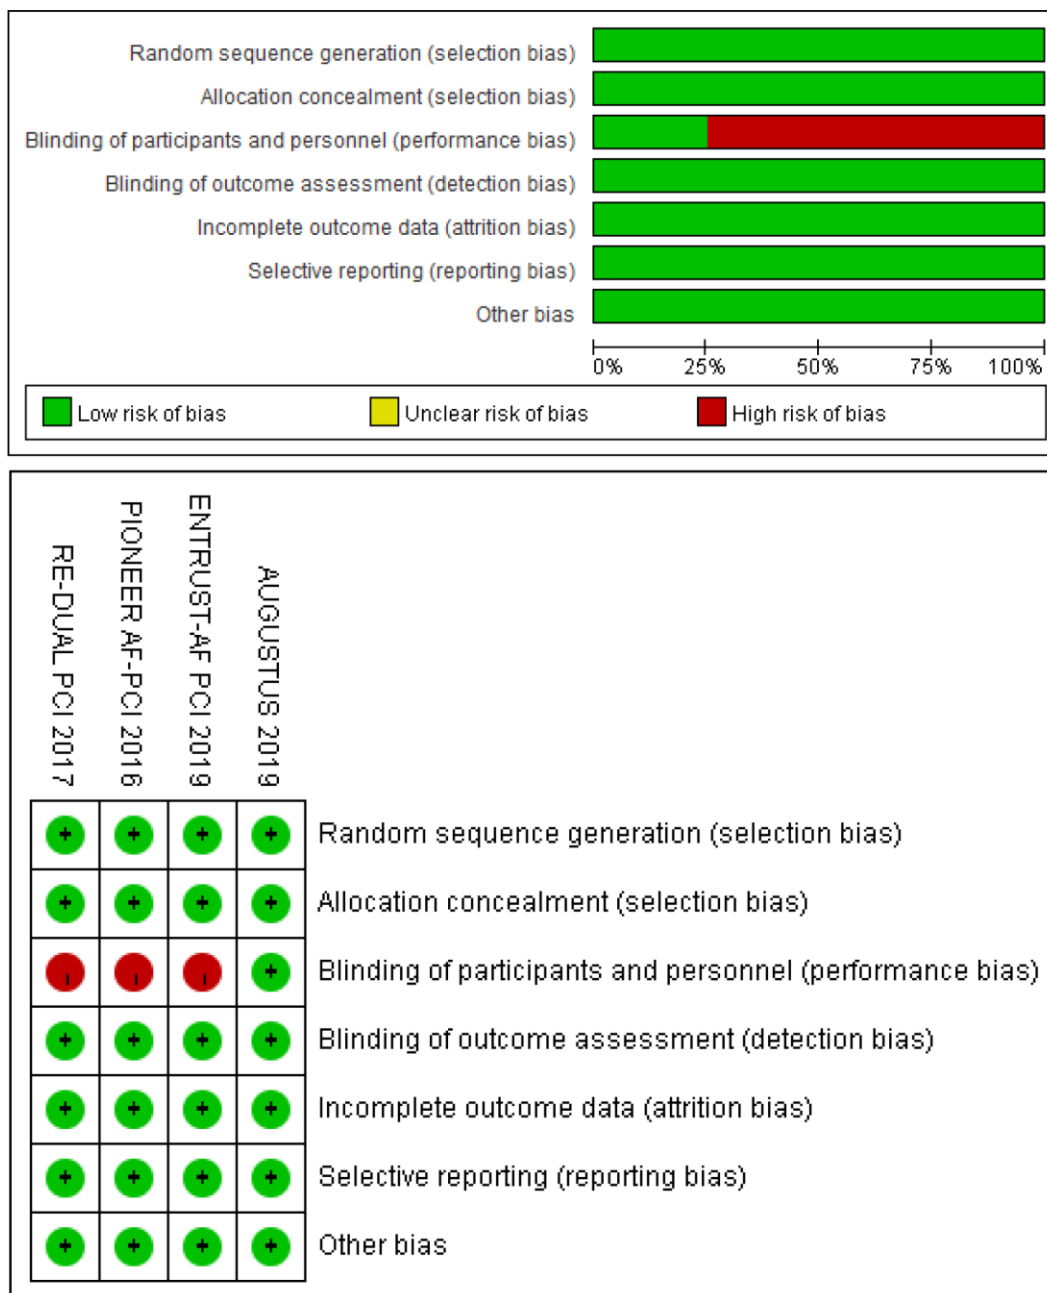

**Supplementary Figure 1. Risk-of-Bias assessment of the randomized controlled trials.**

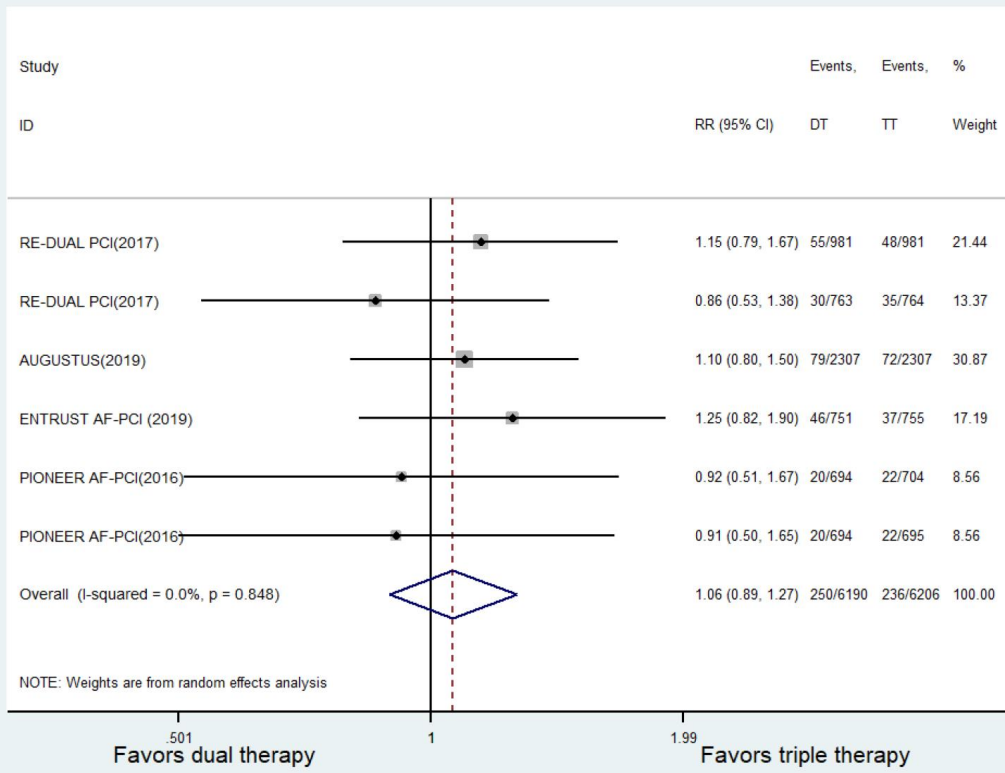

**Supplementary Figure 2. Results of the meta-analysis of the all-cause death.**

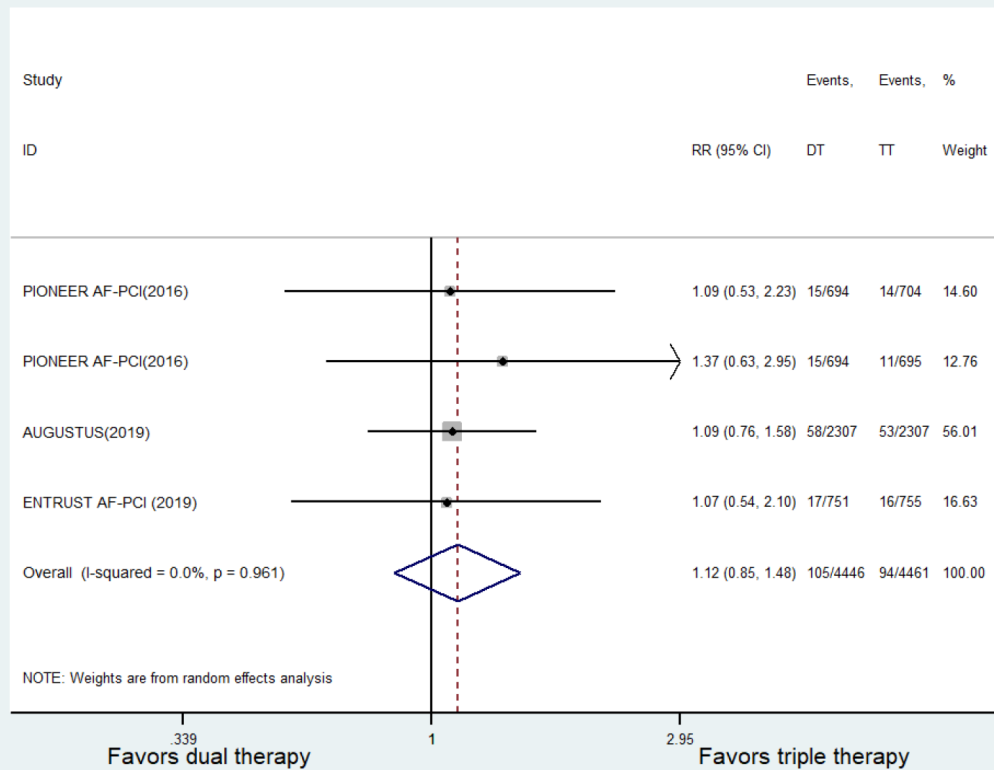

**Supplementary Figure 3. Results of the meta-analysis of the cardiovascular death.**

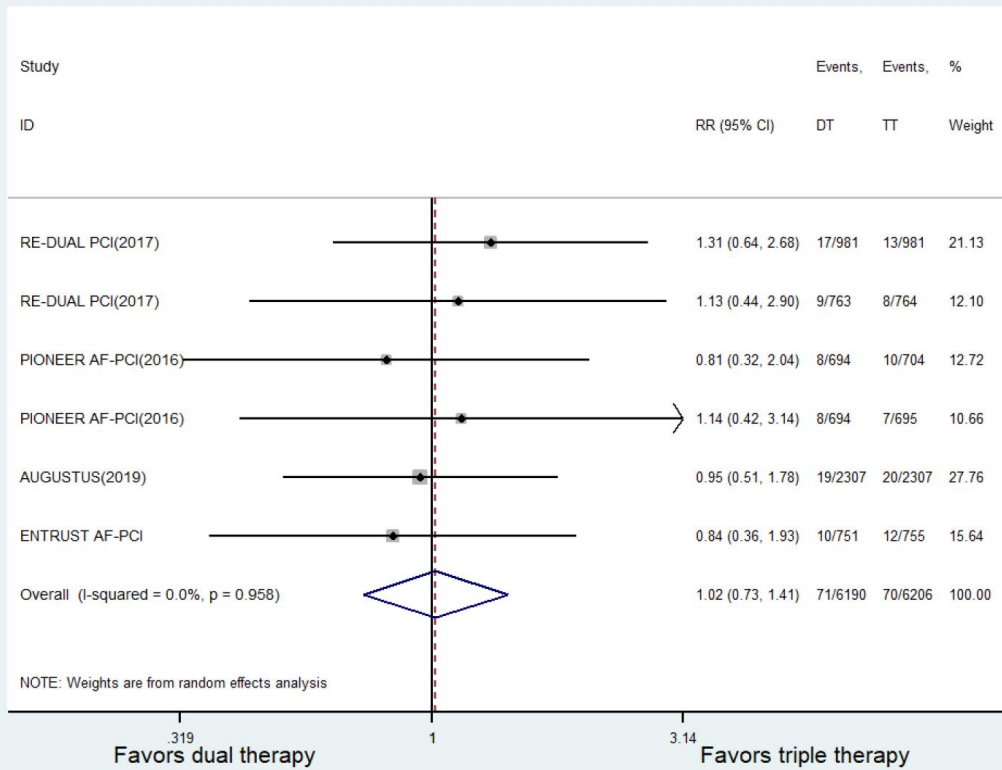

Supplementary Figure 4. Results of the meta-analysis of the stroke.

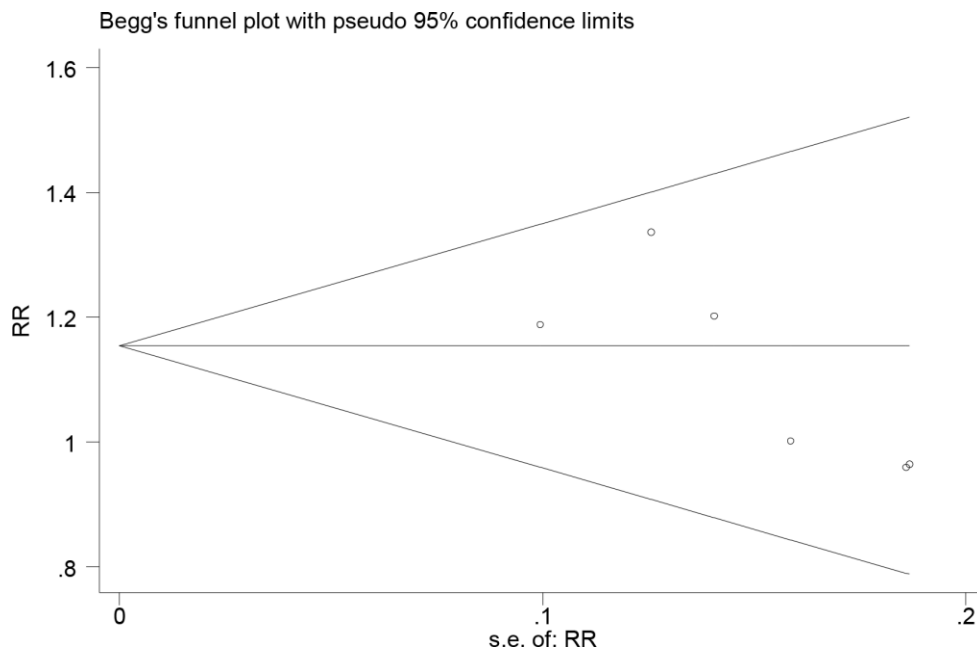

Supplementary Figure 5. The funnel plots.
